# Supplementary material for: Rhodamine-based field-induced single molecule magnets in Yb(iii) and Dy(iii) series
Source: Royal Society of Chemistry journal article supplement (doi:10.1039/c5nj01724f), 2015-01-01
Supplement: c5nj01724f1.pdf [file c5nj01724f1.pdf]

Supporting Materials for  
**Rhodamine-based field-induced single molecule magnets in  
Yb(III) and Dy(III) series**

Wei Huang, Jun Xu, Dayu Wu,\* Xingcai Huang and Jun Jiang

Jiangsu Key Laboratory of Advanced Catalytic Materials and Technology, School of  
Petrochemical Engineering, Changzhou University, Changzhou, Jiangsu 213164,  
China.

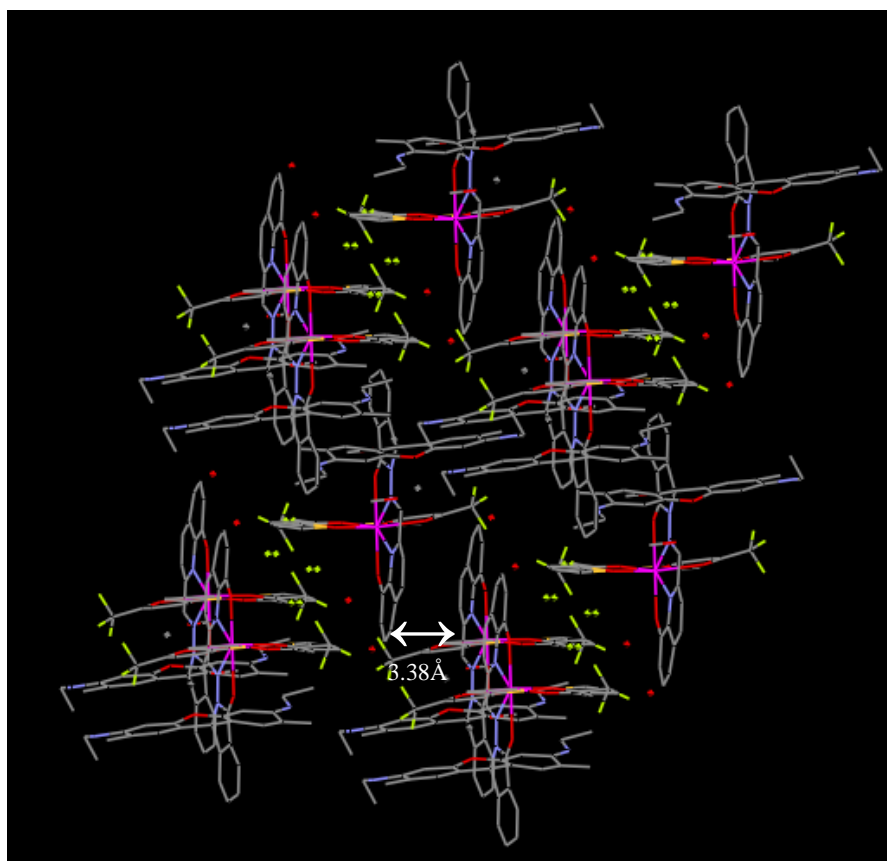

Figure S1. Crystal packing diagram of complex 3 showing the face-to-face  $\pi$ ... $\pi$  stacking interactions. Magenta: Yb, Gray: C, Blue: N, Red: O, Yellow: F.

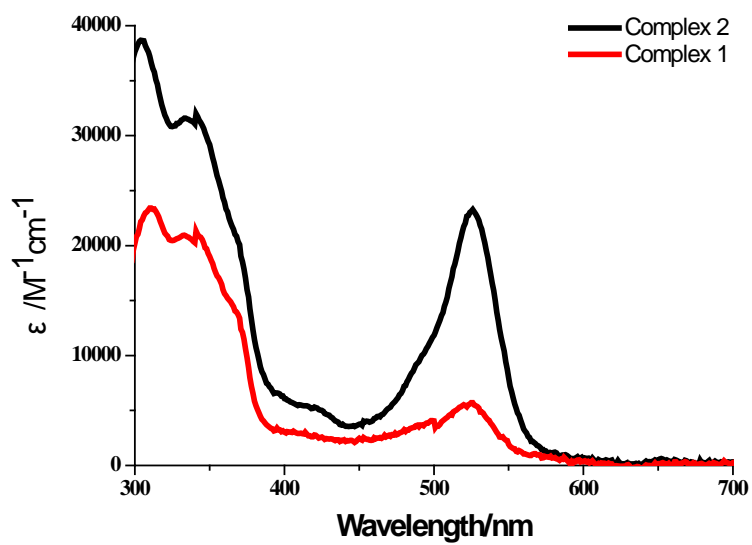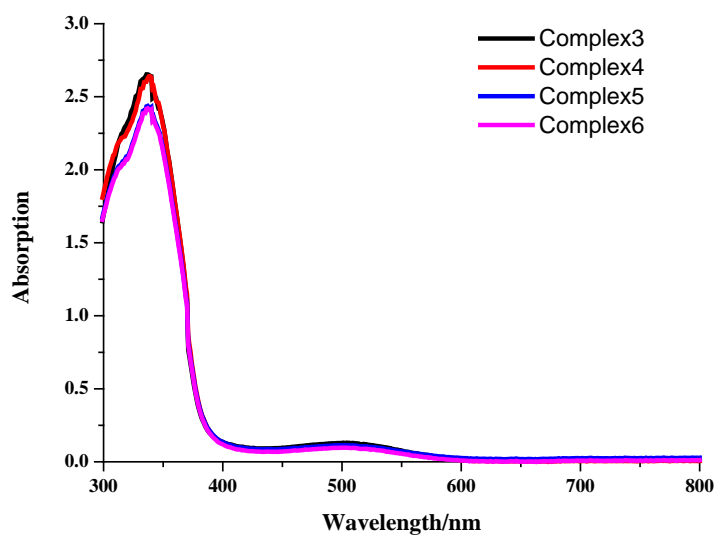

**Figure S2.** Uv-vis spectra of compounds **1-2** in  $CH_3CN$ (RT) and Uv spectra of compounds **3-6** in  $CH_3CN$ (RT,  $5 \times 10^{-6}$  M)

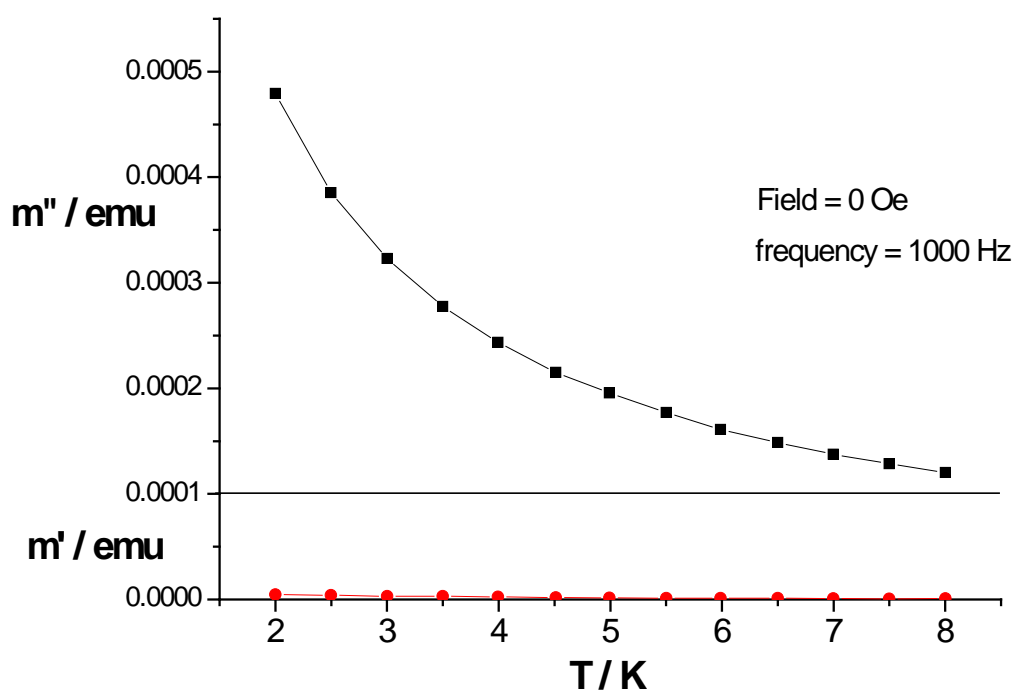

**Figure S3.** Temperature dependence of  $m'$  and  $m''$  of **1** under zero static field with a 3.0 G oscillating field at frequency of 1.0 kHz.

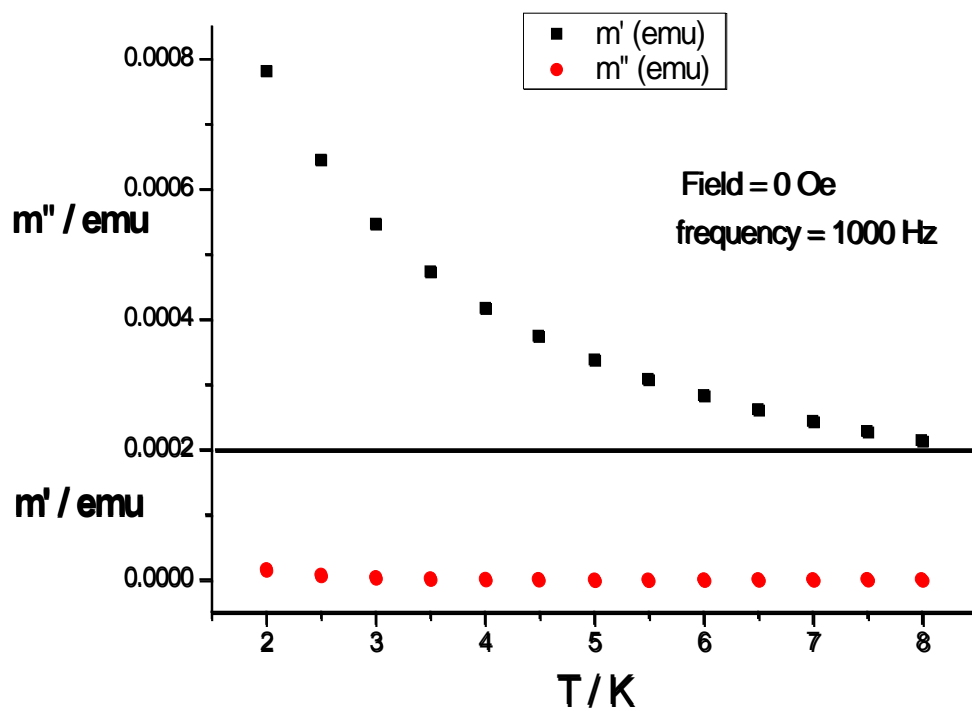

**Figure S4.** Temperature dependence of  $m'$  and  $m''$  of **3** under zero static field with a 3.0 G oscillating field at frequency of 1.0 kHz.

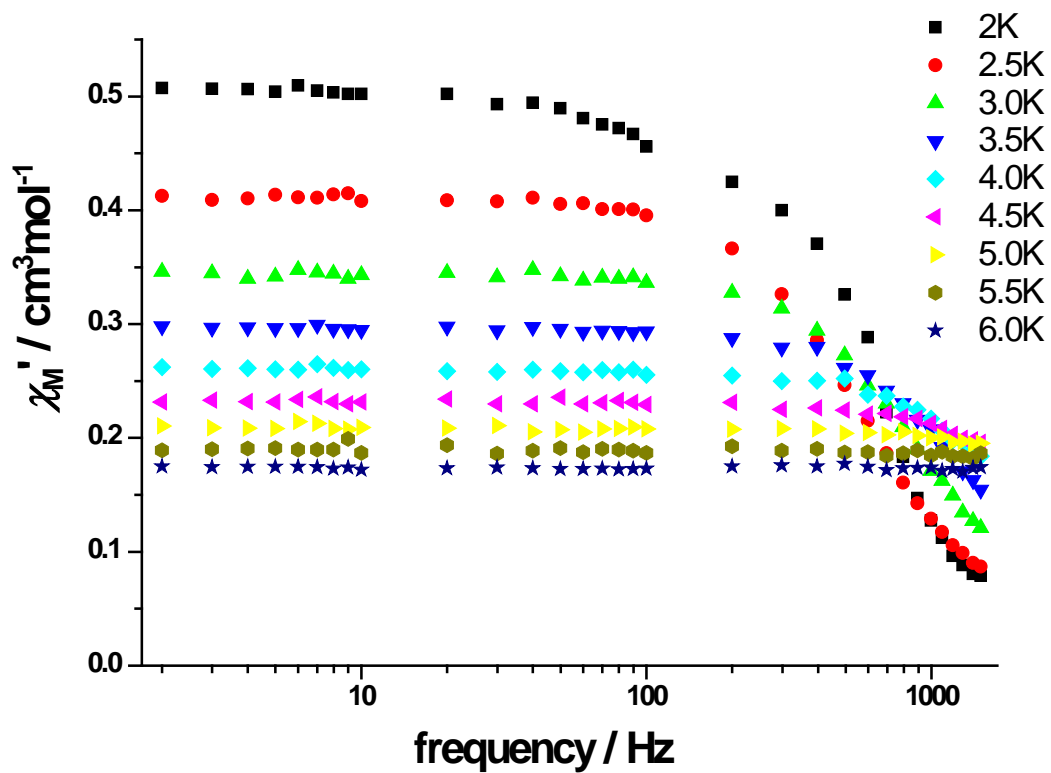

**Figure S5.** The in-phase ac susceptibility of compound **1** under 1000 Oe static field with a 3.0 G oscillating field at frequencies in the range of 1 Hz to 1.5 kHz.

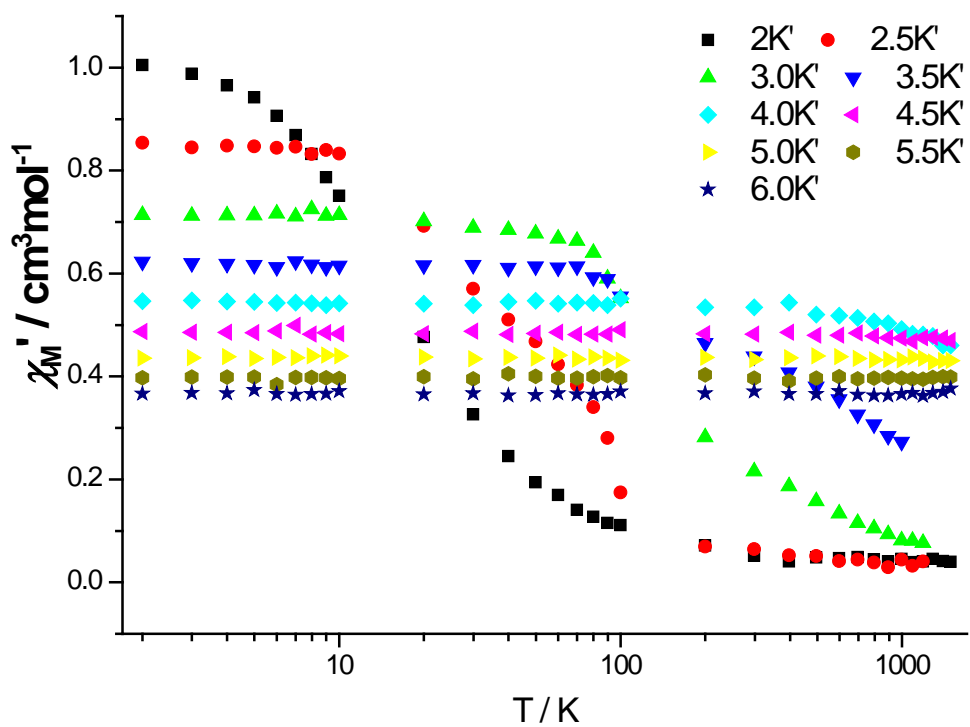

**Figure S6.** The in-phase ac susceptibility of compound **3** under 1000 Oe static field with a 3.0 G oscillating field at frequencies in the range of 1 Hz to 1.5 kHz.

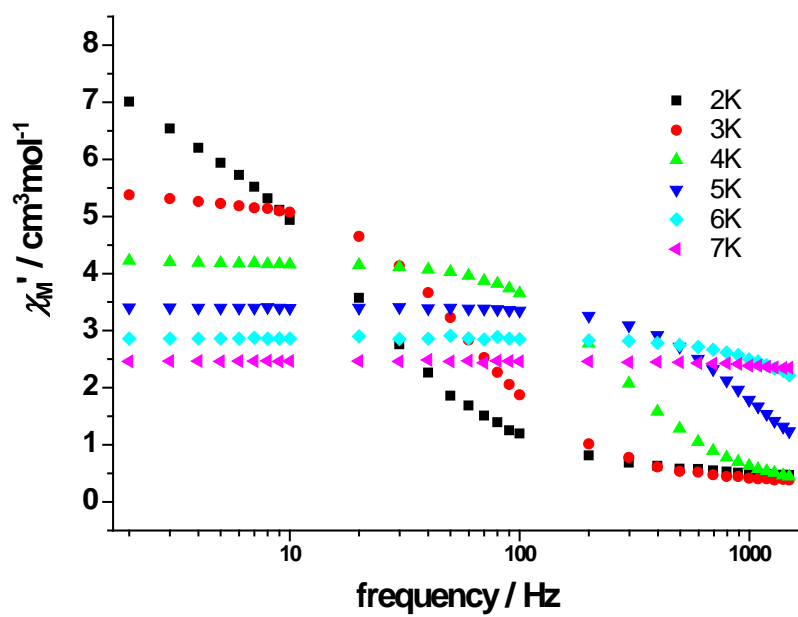

**Figure S7.** The in-phase ac susceptibility of compound **4** under 1000 Oe static field with a 3.0 G oscillating field at frequencies in the range of 1 Hz to 1.5 kHz.



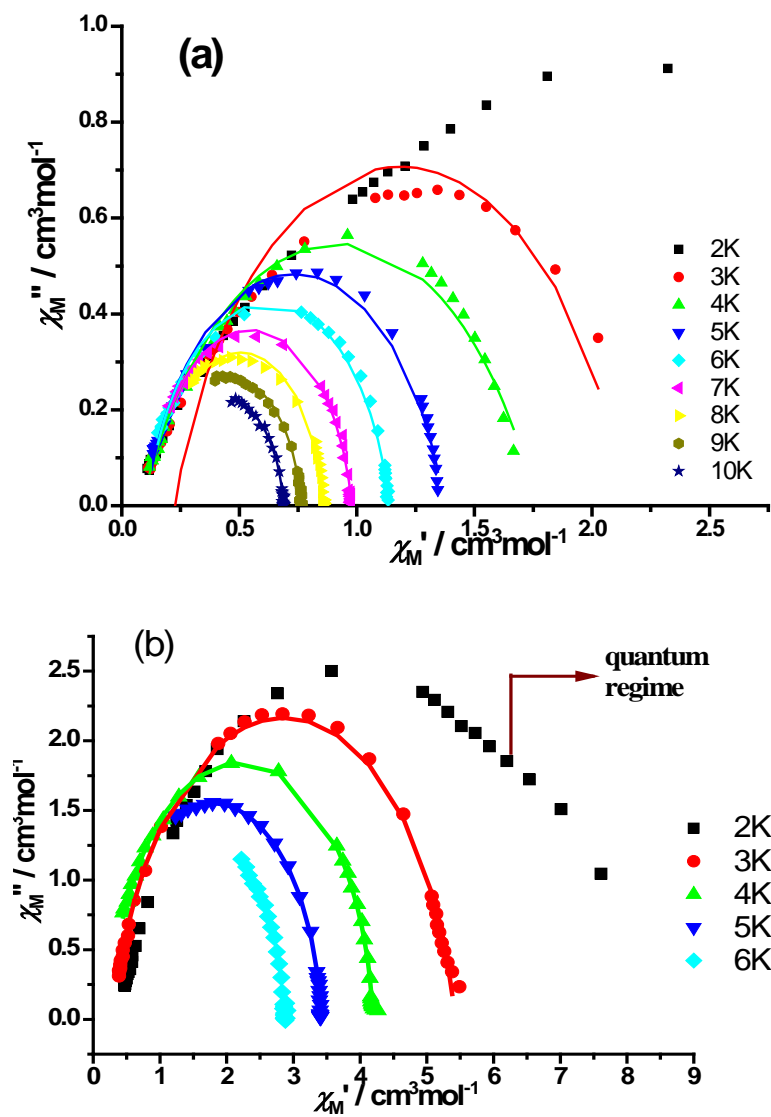

**Figure S8.** Cole–Cole plots for **2** (a) and **4** (b) obtained using the ac susceptibility data at a 1 kOe dc field.

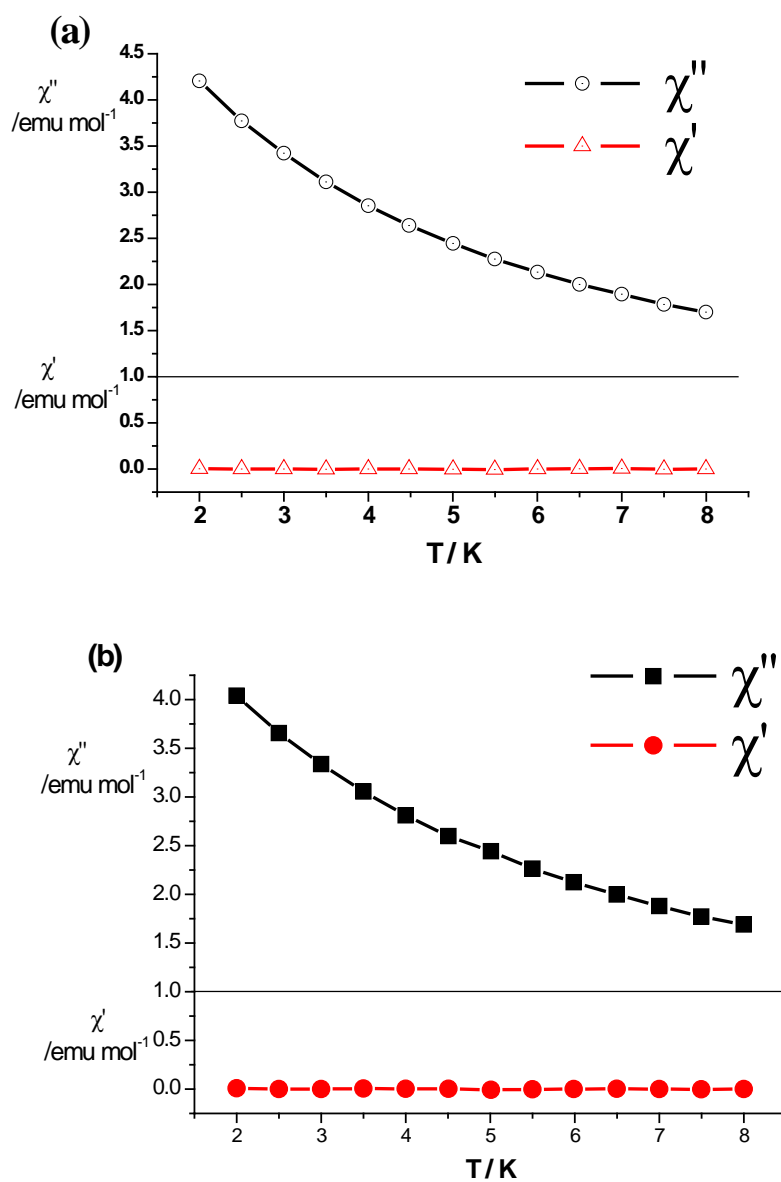

**Figure S9.** (a) Temperature dependence of ac signals of **5** under zero static field with a 3.0 Oe oscillating field at frequency of 1.0 kHz. (b) Temperature dependence of ac signals of **5** under 1000 Oe static field with a 3.0 Oe oscillating field at frequency of 1.0 kHz.

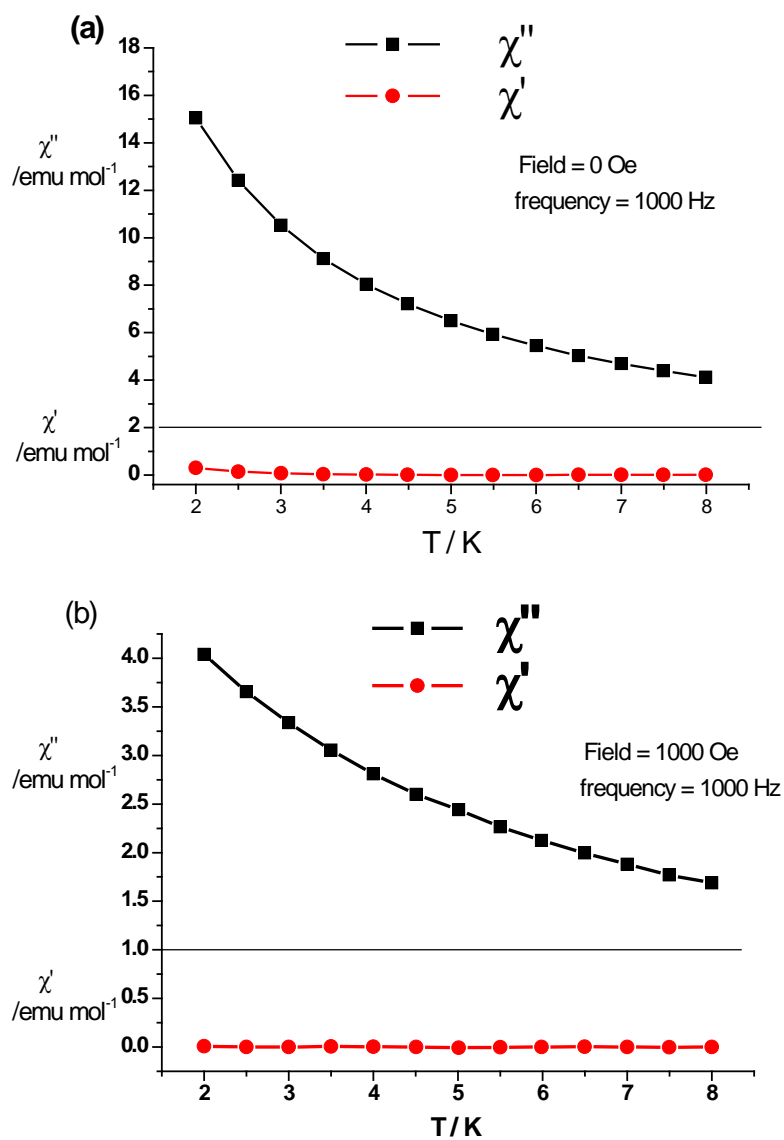

**Figure S10.** (a) Temperature dependence of ac signals of **6** under zero static field with a 3.0 G oscillating field at frequency of 1.0 kHz. (b) Temperature dependence of ac signals of **6** under 1000 Oe static field with a 3.0 Oe oscillating field at frequency of 1.0 kHz.

Temp = 296

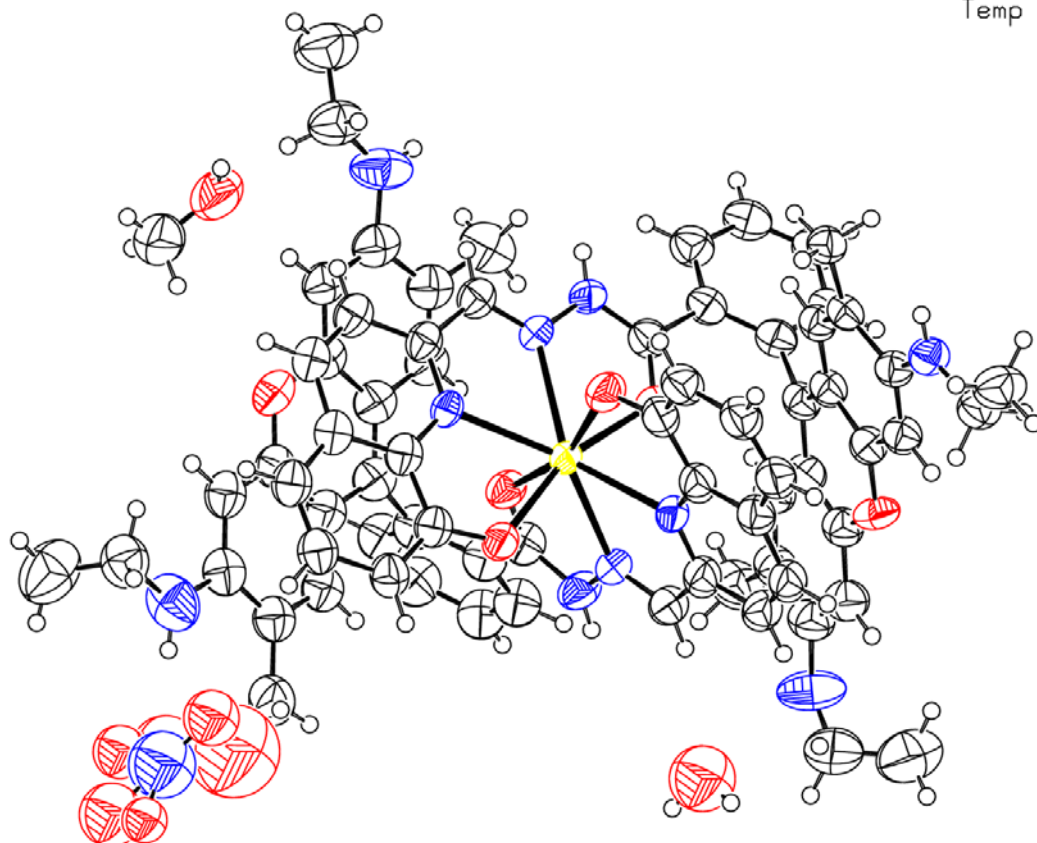

**Figure S11.** The ORTEP style image of the complex **1**

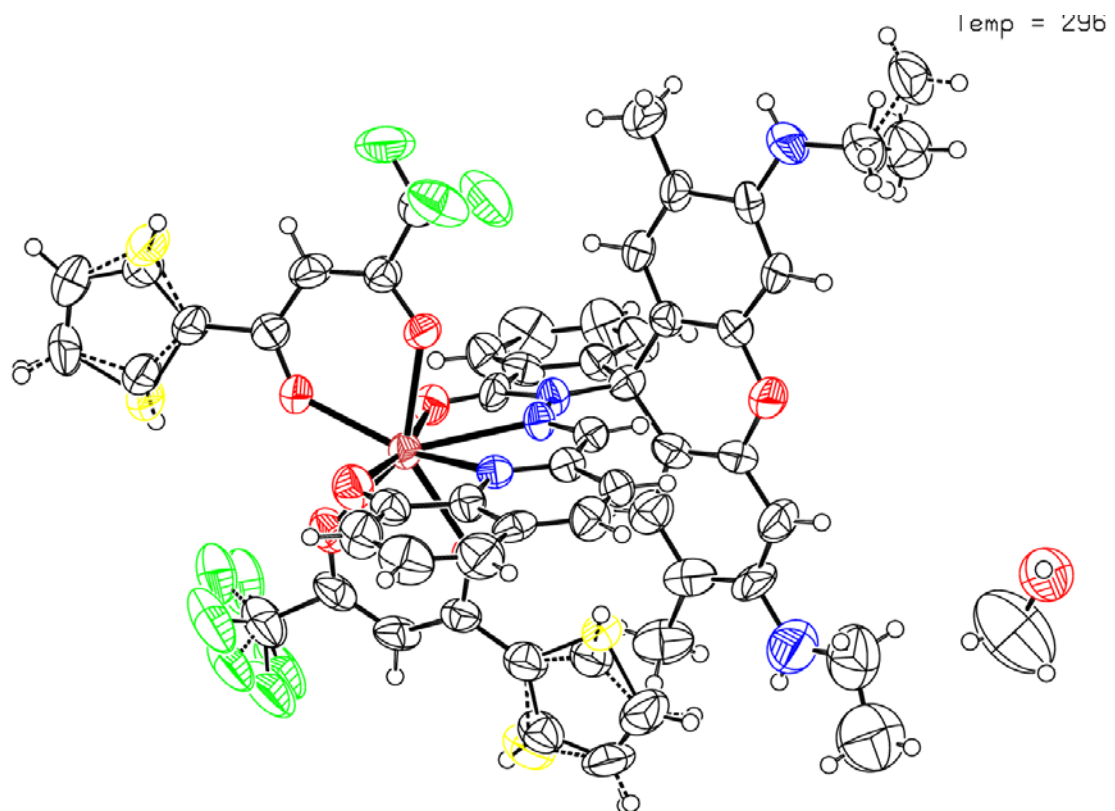

**Figure S12.** The ORTEP style image of the complex **3**

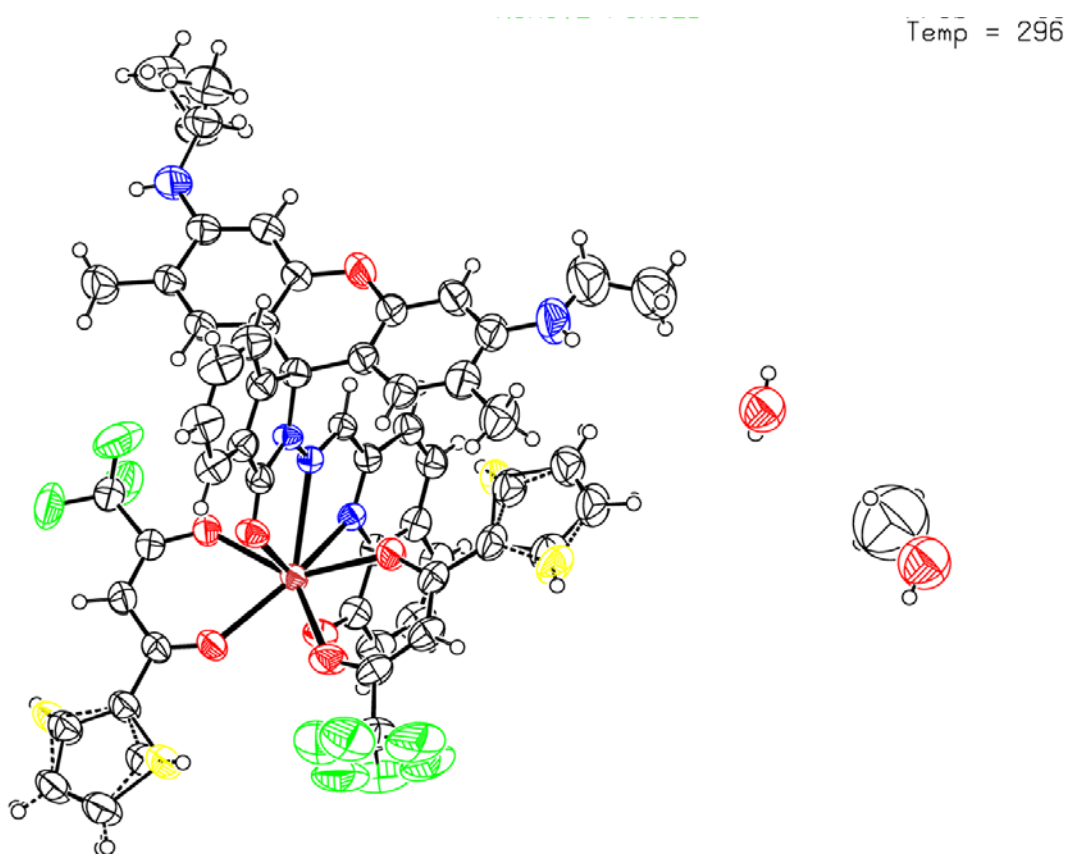

**Figure S13.** The ORTEP style image of the complex 4.

Temp = 296

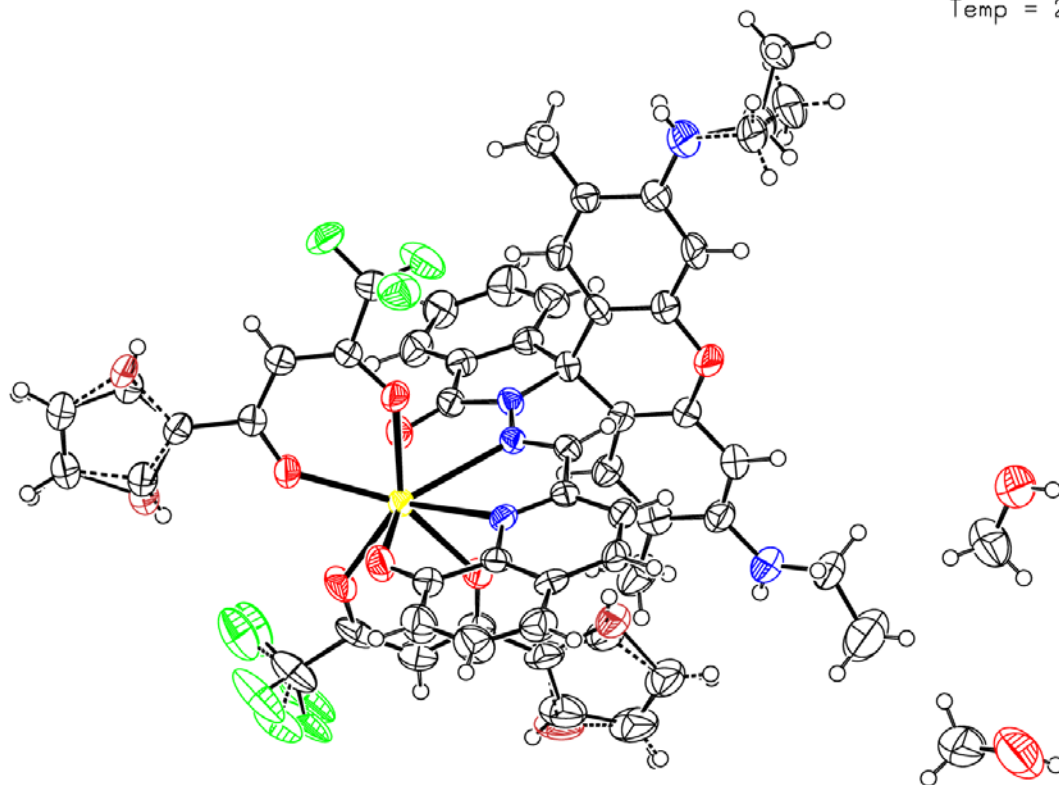

**Figure S14.** The ORTEP style image of the complex **5**.

Temp = 296

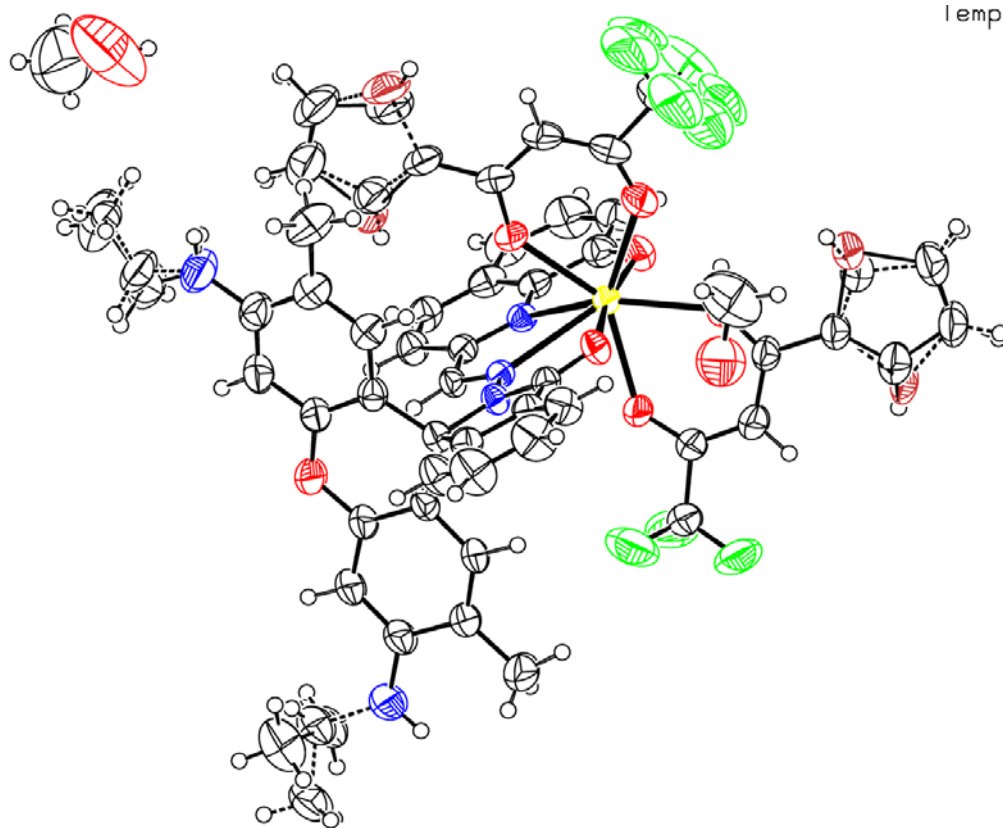

**Figure S15.** The ORTEP style image of the complex **6**



Table S1. The parameters of  $\chi_T$ ,  $\chi_S$ ,  $\tau$ , and  $\alpha$  used in the analyses by Debye model for complex **1** and **3** under 1000 Oe field.

|            | <b>1</b>           |                      |                      |                      | <b>3</b>             |                       |                      |                      |
|------------|--------------------|----------------------|----------------------|----------------------|----------------------|-----------------------|----------------------|----------------------|
| Temp       | 2.0 K              | 2.5K                 | 3.0K                 | 3.5K                 | 2.0 K                | 2.5K                  | 3.0K                 | 3.5K                 |
| $\chi_T$   | 2.23               | 2.20                 | 2.17                 | 2.14                 | 2.67                 | 2.39                  | 2.33                 | 2.29                 |
| $\chi_S$   | 1.76               | 1.81                 | 1.84                 | 1.87                 | 3.68                 | 3.68                  | 1.63                 | 1.68                 |
| $\tau$ (s) | $5 \times 10^{-4}$ | $2.8 \times 10^{-4}$ | $1.7 \times 10^{-4}$ | $1.1 \times 10^{-4}$ | $9.3 \times 10^{-3}$ | $1.86 \times 10^{-3}$ | $4.3 \times 10^{-4}$ | $1.3 \times 10^{-4}$ |
| $\alpha$   | 0.035              | 0.048                | 0.031                | 0.021                | 0.090                | 0.062                 | 0.020                | 0.08                 |

Table S2. The parameters of  $\chi_T$ ,  $\chi_S$ ,  $\tau$ , and  $\alpha$  used in the analyses by Debye model for complex **2**, **4** under 1000 Oe field.

|             | <b>4</b>          |                      |                      |                      | <b>2</b> |                    |                      |                    |                      |                      |                      |                      |
|-------------|-------------------|----------------------|----------------------|----------------------|----------|--------------------|----------------------|--------------------|----------------------|----------------------|----------------------|----------------------|
| Temp<br>(K) | 2.0               | 3.0                  | 4.0                  | 5.0                  | 3.0      | 4.0                | 5.0                  | 6.0                | 7.0                  | 8.0                  | 9.0                  | 10.0                 |
| $\chi_T$    | 21.4              | 20.15                | 19.55                | 19.22                | 2.34     | 1.71               | 1.52                 | 1.42               | 1.33                 | 1.26                 | 1.50                 | 1.43                 |
| $\chi_S$    | 13.6              | 14.96                | 15.60                | 15.88                | 0.027    | 0.05               | 0.24                 | 0.35               | 0.44                 | 0.50                 | 0.86                 | 0.94                 |
| $\tau$ (s)  | 0.011             | $2.7 \times 10^{-3}$ | $5.7 \times 10^{-4}$ | $1.6 \times 10^{-4}$ | 0.021    | $7 \times 10^{-3}$ | $2.4 \times 10^{-3}$ | $1 \times 10^{-3}$ | $4.8 \times 10^{-4}$ | $2.4 \times 10^{-4}$ | $1.4 \times 10^{-4}$ | $1.0 \times 10^{-4}$ |
| $\alpha$    | 0.28 <sup>a</sup> | 0.12                 | 0.04                 | 0.03                 | 0.35     | 0.27               | 0.18                 | 0.15               | 0.136                | 0.124                | 0.109                | 0.068                |

a: the data at 2 K is not reliable because the system enters the quantum regime.

**Table S3. Comparison of Bond Distance(Å) and Bond Angles(°) for Complexes 1-6.**

| Complex 1        |           |                  |           |
|------------------|-----------|------------------|-----------|
| Yb(1)-O(1)       | 2.235(6)  | Yb(1)-N(10)      | 2.392(7)  |
| Yb(1)-O(4)       | 2.264(6)  | Yb(1)-N(5)       | 2.402(6)  |
| Yb(1)-O(5)       | 2.307(6)  | Yb(1)-N(9)       | 2.442(8)  |
| Yb(1)-O(2)       | 2.338(6)  | Yb(1)-N(4)       | 2.460(7)  |
| O(1)-Yb(1)-O(4)  | 96.9(2)   | N(10)-Yb(1)-N(5) | 140.1(2)  |
| O(1)-Yb(1)-O(5)  | 91.1(2)   | O(1)-Yb(1)-N(9)  | 83.1(2)   |
| O(4)-Yb(1)-O(5)  | 161.6(2)  | O(4)-Yb(1)-N(9)  | 133.1(2)  |
| O(1)-Yb(1)-O(2)  | 162.3(2)  | O(5)-Yb(1)-N(9)  | 64.2(2)   |
| O(4)-Yb(1)-O(2)  | 91.7(2)   | O(2)-Yb(1)-N(9)  | 79.8(2)   |
| O(5)-Yb(1)-O(2)  | 85.3(2)   | N(10)-Yb(1)-N(9) | 64.4(3)   |
| O(1)-Yb(1)-N(10) | 85.6(2)   | N(5)-Yb(1)-N(9)  | 137.2(2)  |
| O(4)-Yb(1)-N(10) | 68.8(3)   | O(1)-Yb(1)-N(4)  | 132.6(2)  |
| O(5)-Yb(1)-N(10) | 128.6(2)  | O(4)-Yb(1)-N(4)  | 81.3(2)   |
| O(2)-Yb(1)-N(10) | 83.2(2)   | O(5)-Yb(1)-N(4)  | 81.1(2)   |
| O(1)-Yb(1)-N(5)  | 69.2(2)   | O(2)-Yb(1)-N(4)  | 63.9(2)   |
| O(4)-Yb(1)-N(5)  | 83.6(2)   | N(10)-Yb(1)-N(4) | 134.7(2)  |
| O(5)-Yb(1)-N(5)  | 83.8(2)   | N(5)-Yb(1)-N(4)  | 63.5(2)   |
| O(2)-Yb(1)-N(5)  | 127.3(2)  | N(9)-Yb(1)-N(4)  | 131.5(2)  |
| Complex 3        |           |                  |           |
| Yb(1)-O(3)       | 2.234(11) | Yb(1)-O(6)       | 2.301(10) |
| Yb(1)-O(7)       | 2.250(9)  | Yb(1)-O(2)       | 2.404(9)  |
| Yb(1)-O(4)       | 2.271(8)  | Yb(1)-N(5)       | 2.427(10) |
| Yb(1)-O(5)       | 2.273(9)  | Yb(1)-N(4)       | 2.562(10) |
| O(3)-Yb(1)-O(7)  | 101.6(4)  | O(6)-Yb(1)-O(2)  | 84.9(4)   |
| O(3)-Yb(1)-O(4)  | 95.8(4)   | O(3)-Yb(1)-N(5)  | 67.7(4)   |
| O(7)-Yb(1)-O(4)  | 139.7(3)  | O(7)-Yb(1)-N(5)  | 72.0(3)   |
| O(3)-Yb(1)-O(5)  | 85.1(4)   | O(4)-Yb(1)-N(5)  | 81.9(3)   |
| O(7)-Yb(1)-O(5)  | 142.0(3)  | O(5)-Yb(1)-N(5)  | 142.1(4)  |
| O(4)-Yb(1)-O(5)  | 75.0(3)   | O(6)-Yb(1)-N(5)  | 130.1(4)  |
| O(3)-Yb(1)-O(6)  | 87.4(4)   | O(2)-Yb(1)-N(5)  | 125.9(3)  |
| O(7)-Yb(1)-O(6)  | 71.9(4)   | O(3)-Yb(1)-N(4)  | 129.5(3)  |
| O(4)-Yb(1)-O(6)  | 145.5(4)  | O(7)-Yb(1)-N(4)  | 66.7(3)   |
| O(5)-Yb(1)-O(6)  | 71.1(4)   | O(4)-Yb(1)-N(4)  | 74.2(3)   |
| O(3)-Yb(1)-O(2)  | 166.0(3)  | O(5)-Yb(1)-N(4)  | 135.3(3)  |
| O(7)-Yb(1)-O(2)  | 87.0(3)   | O(6)-Yb(1)-N(4)  | 128.4(4)  |
| O(4)-Yb(1)-O(2)  | 84.1(3)   | O(2)-Yb(1)-N(4)  | 64.0(3)   |
| O(5)-Yb(1)-O(2)  | 81.4(3)   | N(5)-Yb(1)-N(4)  | 62.0(3)   |

## Complex 4

|                 |            |                 |            |
|-----------------|------------|-----------------|------------|
| Dy(1)-O(5)      | 2.273(4)   | Dy(1)-O(3)      | 2.349(4)   |
| Dy(1)-O(1)      | 2.313(4)   | Dy(1)-O(6)      | 2.464(4)   |
| Dy(1)-O(4)      | 2.314(4)   | Dy(1)-N(5)      | 2.484(4)   |
| Dy(1)-O(2)      | 2.345(4)   | Dy(1)-N(4)      | 2.600(4)   |
| O(5)-Dy(1)-O(1) | 85.92(16)  | O(3)-Dy(1)-O(6) | 85.97(16)  |
| O(5)-Dy(1)-O(4) | 101.04(16) | O(5)-Dy(1)-N(5) | 66.87(14)  |
| O(1)-Dy(1)-O(4) | 142.31(15) | O(1)-Dy(1)-N(5) | 141.85(15) |
| O(5)-Dy(1)-O(2) | 96.09(16)  | O(4)-Dy(1)-N(5) | 72.00(14)  |
| O(1)-Dy(1)-O(2) | 72.62(14)  | O(2)-Dy(1)-N(5) | 83.81(14)  |
| O(4)-Dy(1)-O(2) | 141.53(14) | O(3)-Dy(1)-N(5) | 129.03(16) |
| O(5)-Dy(1)-O(3) | 88.00(17)  | O(6)-Dy(1)-N(5) | 124.13(13) |
| O(1)-Dy(1)-O(3) | 72.87(16)  | O(5)-Dy(1)-N(4) | 127.89(14) |
| O(4)-Dy(1)-O(3) | 70.44(15)  | O(1)-Dy(1)-N(4) | 135.27(14) |
| O(2)-Dy(1)-O(3) | 144.84(15) | O(4)-Dy(1)-N(4) | 67.14(14)  |
| O(5)-Dy(1)-O(6) | 168.71(13) | O(2)-Dy(1)-N(4) | 75.12(13)  |
| O(1)-Dy(1)-O(6) | 83.19(15)  | O(3)-Dy(1)-N(4) | 128.18(15) |
| O(4)-Dy(1)-O(6) | 85.92(15)  | O(6)-Dy(1)-N(4) | 62.97(12)  |
| O(2)-Dy(1)-O(6) | 83.49(15)  | N(5)-Dy(1)-N(4) | 61.18(13)  |

## Complex 5

|                  |          |                  |          |
|------------------|----------|------------------|----------|
| Tb(1)-O(1)       | 2.274(8) | Tb(1)-O(4)       | 2.349(7) |
| Tb(1)-O(5)       | 2.331(7) | Tb(1)-O(2A)      | 2.480(7) |
| Tb(1)-O(6)       | 2.337(7) | Tb(1)-N(1)       | 2.502(8) |
| Tb(1)-O(7)       | 2.343(7) | Tb(1)-N(2)       | 2.611(8) |
| O(1)-Tb(1)-O(5)  | 86.9(3)  | O(4)-Tb(1)-O(2A) | 82.5(3)  |
| O(1)-Tb(1)-O(6)  | 88.7(3)  | O(1)-Tb(1)-N(1)  | 66.6(3)  |
| O(5)-Tb(1)-O(6)  | 72.6(3)  | O(5)-Tb(1)-N(1)  | 142.7(3) |
| O(1)-Tb(1)-O(7)  | 100.9(3) | O(6)-Tb(1)-N(1)  | 129.2(3) |
| O(5)-Tb(1)-O(7)  | 142.4(3) | O(7)-Tb(1)-N(1)  | 71.4(3)  |
| O(6)-Tb(1)-O(7)  | 70.8(3)  | O(4)-Tb(1)-N(1)  | 83.4(3)  |
| O(1)-Tb(1)-O(4)  | 95.5(3)  | O(2A)-Tb(1)-N(1) | 123.6(3) |
| O(5)-Tb(1)-O(4)  | 73.1(3)  | O(1)-Tb(1)-N(2)  | 127.3(3) |
| O(6)-Tb(1)-O(4)  | 145.1(3) | O(5)-Tb(1)-N(2)  | 134.4(3) |
| O(7)-Tb(1)-O(4)  | 141.0(3) | O(6)-Tb(1)-N(2)  | 128.7(3) |
| O(1)-Tb(1)-O(2A) | 169.0(3) | O(7)-Tb(1)-N(2)  | 67.7(3)  |
| O(5)-Tb(1)-O(2A) | 82.2(3)  | O(4)-Tb(1)-N(2)  | 74.2(3)  |
| O(6)-Tb(1)-O(2A) | 86.8(3)  | O(2A)-Tb(1)-N(2) | 62.6(2)  |
| O(7)-Tb(1)-O(2A) | 87.2(3)  | N(1)-Tb(1)-N(2)  | 61.0(3)  |

## Complex 6

|            |         |            |         |
|------------|---------|------------|---------|
| Ho(1)-O(6) | 2.25(3) | Ho(1)-O(1) | 2.33(2) |
|------------|---------|------------|---------|

|                 |           |                 |          |
|-----------------|-----------|-----------------|----------|
| Ho(1)-O(2)      | 2.29(2)   | Ho(1)-O(7)      | 2.45(2)  |
| Ho(1)-O(4)      | 2.31(2)   | Ho(1)-N(5)      | 2.48(3)  |
| Ho(1)-O(3)      | 2.32(3)   | Ho(1)-N(4)      | 2.59(3)  |
| O(6)-Ho(1)-O(2) | 86.0(10)  | O(1)-Ho(1)-O(7) | 83.1(9)  |
| O(6)-Ho(1)-O(4) | 101.3(10) | O(6)-Ho(1)-N(5) | 67.1(9)  |
| O(2)-Ho(1)-O(4) | 142.1(9)  | O(2)-Ho(1)-N(5) | 142.1(9) |
| O(6)-Ho(1)-O(3) | 88.4(10)  | O(4)-Ho(1)-N(5) | 72.1(9)  |
| O(2)-Ho(1)-O(3) | 72.6(10)  | O(3)-Ho(1)-N(5) | 129.5(9) |
| O(4)-Ho(1)-O(3) | 70.6(9)   | O(1)-Ho(1)-N(5) | 83.2(8)  |
| O(6)-Ho(1)-O(1) | 96.0(9)   | O(7)-Ho(1)-N(5) | 124.4(8) |
| O(2)-Ho(1)-O(1) | 73.3(9)   | O(6)-Ho(1)-N(4) | 128.2(9) |
| O(4)-Ho(1)-O(1) | 141.0(8)  | O(2)-Ho(1)-N(4) | 134.8(9) |
| O(3)-Ho(1)-O(1) | 145.2(9)  | O(4)-Ho(1)-N(4) | 67.3(8)  |
| O(6)-Ho(1)-O(7) | 168.1(8)  | O(3)-Ho(1)-N(4) | 128.1(9) |
| O(2)-Ho(1)-O(7) | 82.4(9)   | O(1)-Ho(1)-N(4) | 74.4(8)  |
| O(4)-Ho(1)-O(7) | 86.5(9)   | O(7)-Ho(1)-N(4) | 63.0(8)  |
| O(3)-Ho(1)-O(7) | 85.7(9)   | N(5)-Ho(1)-N(4) | 61.4(8)  |

---
